# Supplementary material
Source: HighWire-hosted journal article supplement (https://jnm.snmjournals.org/highwire/filestream/94020/field_highwire_adjunct_files/3/Supplemental_Figures_1_2C_and_4.pdf)

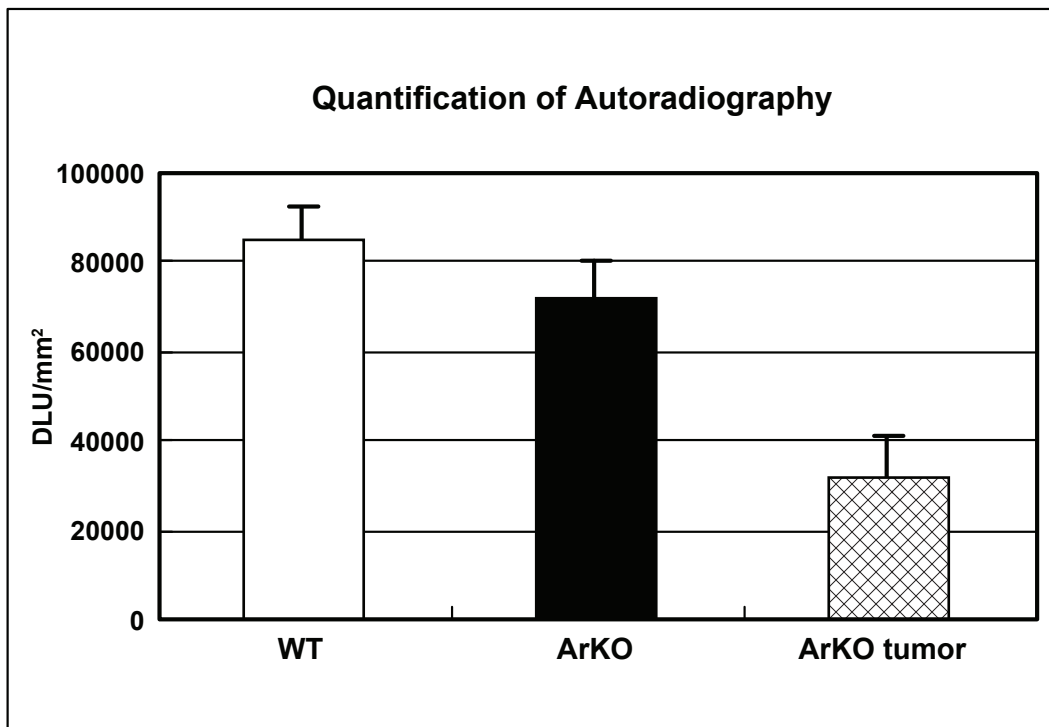

Supplemental Figure 1

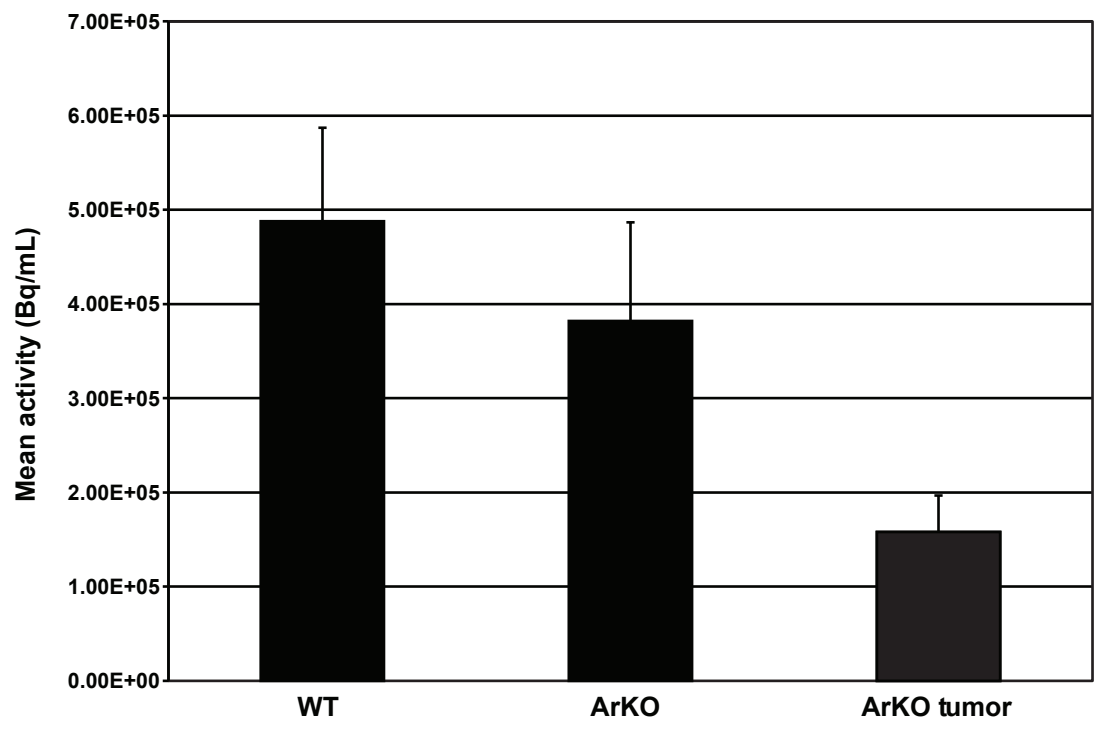

Supplemental Figure 2C

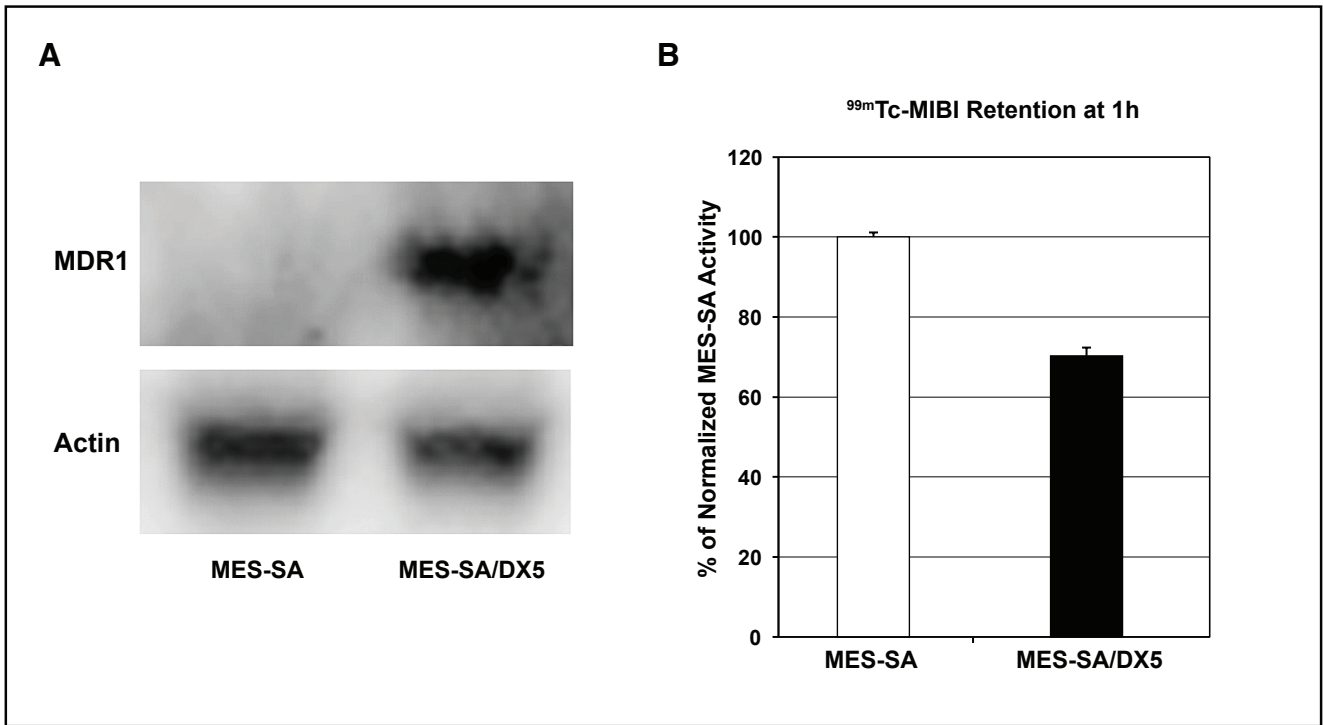

Supplemental Figure 4

Supplement: Supplemental_Figures_1_2C_and_4.pdf [file Supplemental_Figures_1_2C_and_4.pdf]
